# Supplementary material for: Mixotrophic Cultivation Optimization of Microalga Euglena pisciformis AEW501 for Paramylon Production
Source: MDPI journal article supplement (doi:10.3390/md20080518), 2022-08-14
Supplement: s1 [file s1]

Table S1. Composition of modified AF-6 medium

| Components                                       | Content<br>(g/L) | Components                           | Content<br>(g/L) | Components                                          | Content<br>(g/L) |
|--------------------------------------------------|------------------|--------------------------------------|------------------|-----------------------------------------------------|------------------|
| CH <sub>3</sub> COONa                            | 1.00             | MgSO <sub>4</sub> ·7H <sub>2</sub> O | 0.3              | Ferric citrate                                      | 0.002            |
| NaNO <sub>3</sub>                                | 0.14             | Thiamine                             | 0.1              | Na <sub>2</sub> EDTA                                | 0.75             |
|                                                  |                  | HCl                                  |                  |                                                     |                  |
| (NH <sub>4</sub> ) <sub>2</sub> HPO <sub>4</sub> | 0.20             | Vitamin B6                           | 0.1              | MnCl <sub>2</sub> ·4H <sub>2</sub> O                | 0.041            |
| K <sub>2</sub> HPO <sub>4</sub>                  | 0.005            | Biotin                               | 0.2              | ZnCl <sub>2</sub> ·7H <sub>2</sub> O                | 0.005            |
| KH <sub>2</sub> PO <sub>4</sub>                  | 0.01             | Vitamin B12                          | 0.1              | Na <sub>2</sub> MoO <sub>4</sub> ·2H <sub>2</sub> O | 0.004            |
| CaCO <sub>3</sub>                                | 0.01             | Citric acid                          | 0.002            | FeCl <sub>3</sub> ·6H <sub>2</sub> O                | 0.097            |
| CaCl <sub>2</sub> ·2H <sub>2</sub> O             | 0.01             | CoCl <sub>2</sub> ·6H <sub>2</sub> O | 0.002            | -                                                   | -                |

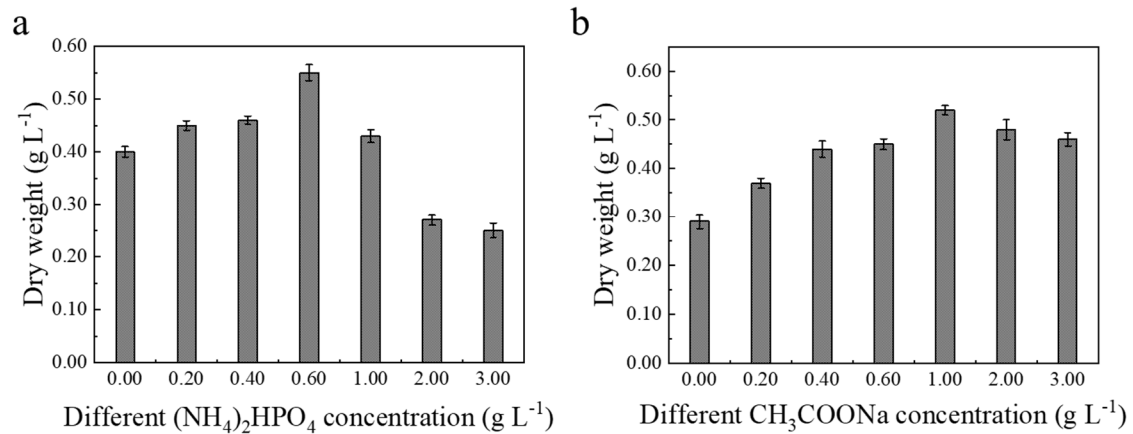

Figure S1. The optimization of diammonium phosphates and sodium acetate concentration after 14 days cultivation. (a: Diammonium phosphates; b: Sodium acetate.) Data were shown as mean  $\pm$  standard deviation ( $n = 3$ ).

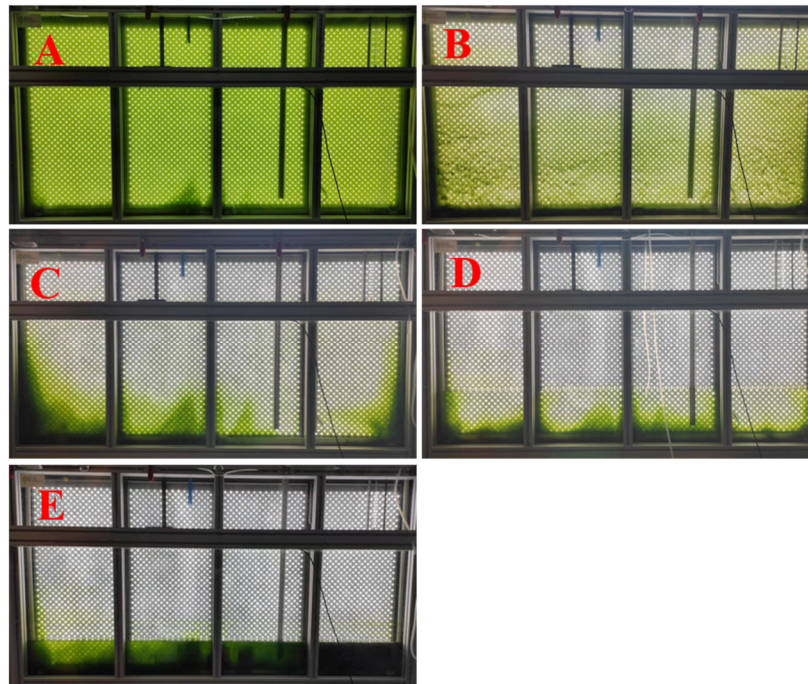

Figure S2. Natural sedimentation of *E. pisciformis* AEW501 during harvest in a 120 L PBR. (Stop ventilation time: A: 0 min; B: 5 min; C: 20 min; D: 40 min; E: 60 min.)

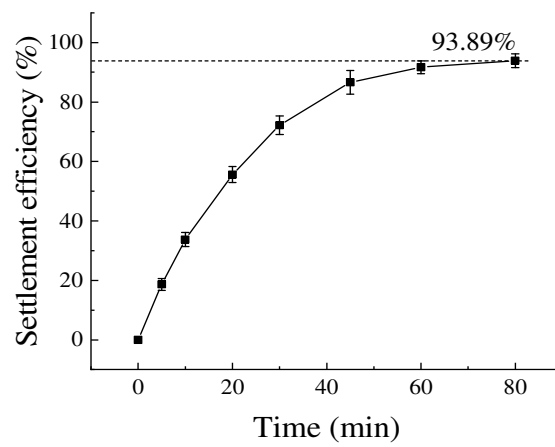

Figure S3. The settling efficiency of *E. pisciformis* AEW501 during harvest.
